# Supplementary material
Source: Royal Society of Chemistry journal article supplement (doi:10.1039/d6cp00397d)
Supplement: d6cp00397d1.pdf [file d6cp00397d1.pdf]

## HEXACHLOROCYCLOTRIPHOSHAZENE: MACROMOLECULAR ASSEMBLIES IN VAPOR AND CRYSTALLINE PHASES. EXPERIMENTAL AND COMPUTATIONAL APPROACH

Semyon S. Egorov<sup>1\*</sup>, Elena Yu. Tupikina<sup>1</sup>, Artyom A. Selyutin<sup>1</sup>

<sup>1</sup>St. Petersburg State University, 7/9 Universitetskaya nab., St. Petersburg 199034, Russia

[\\*semyom.egorov@spbu.ru](mailto:semyom.egorov@spbu.ru)

### Supplementary materials

#### S1. Synthesis of hexachlorocyclotriphosphazene (HCCP)

The well-known preparation procedure of HCCP<sup>1</sup> was modified by adding zinc powder in a stoichiometric amount and pyridine in a catalytic amount to the reaction mixture. Briefly, the mixture of 3.7485 g (0.018 mol) of phosphorus pentachloride PCl<sub>5</sub> in 20 ml of chlorobenzene was added dropwise to a suspension of 0.9624 g (0.018 mol) of ammonium chloride NH<sub>4</sub>Cl and 1.2 g (0.02 mol) of zinc powder (14–50 mesh ASTM) in 30 ml of chlorobenzene. The reaction mixture was stirred under reflux until the indicator paper stopped indicating the acidic medium of hydrochloric acid releasing. As reaction had been proceeding, formation of precipitate was observed. The pale-yellow solid precipitate was treated with petroleum ether followed by the recrystallization from the hot petroleum ether as well. The desired white-crystalline product was obtained and then purified by solid-phase sublimation under  $P = 10$  mmHg;  $T = 373$  K and characterized by the <sup>31</sup>P NMR spectroscopy (Figure 1), PXRD (Figure S2 in *Electronic Supplementary Materials*) and IR-spectroscopy (Figure S3). The corresponding data is presented here: **IR**:  $\nu$  [cm<sup>-1</sup>] = 1208, 873, 599, 520. **<sup>31</sup>P NMR** (191.96 MHz; CDCl<sub>3</sub>):  $\delta$  [ppm] = 20.03 (s, NPN) like in the literature data<sup>49</sup>.

In the FTIR spectra of phosphazene, an interesting absorption peaks are displayed at 1212 and 1189 cm<sup>-1</sup> referring to the asymmetric and symmetric stretching vibration of P=N groups, respectively. The band at 874.8 cm<sup>-1</sup> assigned to P=N skeletal vibration. The characteristic absorption at 599.9, 519.8 cm<sup>-1</sup> are related to asymmetric and symmetric vibration of P–Cl bonds. Strong peak due to  $\nu_a(\text{PNP})$  ring asymmetric stretching at 1212 cm<sup>-1</sup>, together with a peak due to  $\nu_s(\text{PNP})$  ring asymmetric stretching at 875 cm<sup>-1</sup> formed a weak combination band at 2085 cm<sup>-1</sup>. Bands due to asymmetric and symmetric P–Cl stretching also appeared at 599.9 and 519.8 cm<sup>-1</sup>, respectively.

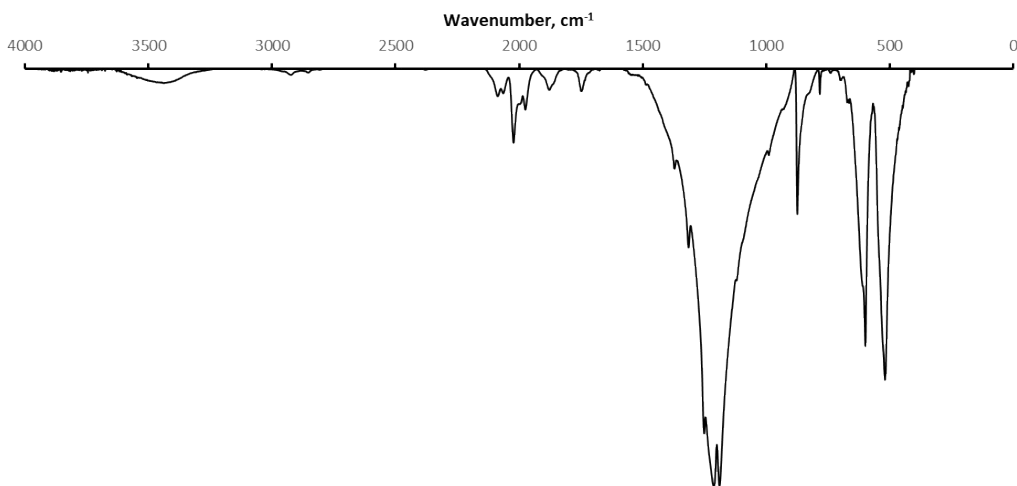

**Figure S1.1.** The IR-spectra of hexachlorocyclotriphosphazene

## S2. Optimized geometries

All the coordinates are given in angstroms. The  $n_i$  value corresponds to the amount of imaginary frequencies detected.

$N_3P_3Cl_6$  by B3LYP-D3

$n_i = 0$

|    |             |             |             |
|----|-------------|-------------|-------------|
| Cl | 2.49936500  | 1.40741200  | -1.57524600 |
| Cl | 2.49920600  | 1.40735900  | 1.57527600  |
| Cl | -0.03056000 | -2.86796300 | 1.57535400  |
| Cl | -0.03070200 | -2.86788500 | -1.57532900 |
| P  | 1.39524800  | 0.78580000  | -0.00001400 |
| P  | -0.01715900 | -1.60111900 | 0.00000100  |
| N  | 1.35110500  | -0.79943200 | -0.00005200 |
| N  | -1.36812500 | -0.77054200 | 0.00003900  |
| Cl | -2.46855300 | 1.46064100  | 1.57527500  |
| Cl | -2.46855200 | 1.46045200  | -1.57528200 |
| P  | -1.37820200 | 0.81537300  | -0.00000600 |
| N  | 0.01676900  | 1.56982000  | -0.00006200 |

$N_3P_3Cl_6$  by APFD

$n_i = 0$

|    |             |            |             |
|----|-------------|------------|-------------|
| Cl | -2.26820200 | 1.72326700 | -1.56166200 |
| Cl | -2.26812700 | 1.72319300 | 1.56170400  |

|    |             |             |             |
|----|-------------|-------------|-------------|
| Cl | 2.62643400  | 1.10265800  | 1.56171200  |
| Cl | 2.62649900  | 1.10261100  | -1.56167800 |
| P  | -1.26748600 | 0.96299600  | -0.00001700 |
| P  | 1.46773400  | 0.61618700  | -0.00000600 |
| N  | 0.19751000  | 1.55762700  | -0.00004700 |
| N  | 1.25021900  | -0.94987000 | 0.00002200  |
| Cl | -0.35834600 | -2.82585600 | 1.56169400  |
| Cl | -0.35826800 | -2.82588500 | -1.56170200 |
| P  | -0.20024700 | -1.57916800 | -0.00001700 |
| N  | -1.44770800 | -0.60775800 | -0.00005700 |

(N<sub>3</sub>P<sub>3</sub>Cl<sub>6</sub>)<sub>4</sub> by B3LYP-D3

$n_i = 0$

|    |             |             |             |
|----|-------------|-------------|-------------|
| Cl | 0.21617000  | 2.22959700  | 2.40337200  |
| Cl | 1.87421300  | -0.05594600 | 1.03328100  |
| Cl | 5.15212200  | 3.64496100  | -0.44238900 |
| Cl | 3.28820600  | 5.64331100  | 1.12212600  |
| P  | 1.47248400  | 1.90060300  | 0.84387700  |
| P  | 3.22900600  | 3.90538600  | 0.08038700  |
| N  | 2.79747000  | 2.73991300  | 1.06586000  |
| N  | 2.36047800  | 4.12803100  | -1.23143600 |
| Cl | 1.01865500  | 2.63349700  | -3.38211000 |
| Cl | -0.54220700 | 4.61968000  | -1.51176900 |
| P  | 1.01708800  | 3.32638400  | -1.48245900 |
| N  | 0.67635200  | 2.12345400  | -0.51049300 |
| Cl | 2.75094700  | -3.49445400 | 1.05303900  |
| Cl | 5.65002000  | -4.37506900 | 0.19306400  |
| Cl | 7.73361100  | -0.52625000 | 1.90881800  |
| Cl | 5.04887100  | 0.81934400  | 2.85162300  |
| P  | 4.51340900  | -2.71753600 | 0.47893300  |
| P  | 5.75776400  | -0.44145600 | 1.45682900  |
| N  | 5.11822800  | -1.87647500 | 1.68001100  |
| N  | 5.59495700  | 0.22564700  | 0.02589900  |
| Cl | 6.42888000  | -0.80019600 | -2.61308600 |
| Cl | 3.65846000  | 0.60493200  | -2.15031800 |
| P  | 4.98947600  | -0.57417300 | -1.19992600 |
| N  | 4.31606200  | -1.98194900 | -0.91533800 |

|    |             |             |             |
|----|-------------|-------------|-------------|
| Cl | -3.79076700 | -4.93957600 | -1.49842700 |
| Cl | -4.66690600 | -1.92420400 | -1.63157600 |
| Cl | 0.30614200  | -0.84204800 | -2.46110000 |
| Cl | 0.82091600  | -3.93795600 | -2.28131400 |
| P  | -3.08943000 | -3.07515200 | -1.12151000 |
| P  | -0.41732100 | -2.49998400 | -1.57774400 |
| N  | -1.88809600 | -2.76822900 | -2.11022400 |
| N  | -0.21505500 | -2.37125200 | -0.01124200 |
| Cl | -1.46228800 | -1.19233500 | 2.37196400  |
| Cl | -0.83564900 | -4.26742600 | 2.15429200  |
| P  | -1.38029400 | -2.67234300 | 1.01854800  |
| N  | -2.83174900 | -2.93176800 | 0.43600300  |
| Cl | -7.24905300 | 0.46258700  | -2.25880300 |
| Cl | -7.75309500 | 2.94775600  | -0.39557200 |
| Cl | -3.19495100 | 3.23760300  | 0.95945100  |
| Cl | -2.31229300 | 0.77435400  | -0.77148400 |
| P  | -6.55533800 | 1.32152200  | -0.56707400 |
| P  | -3.90678200 | 1.48731800  | 0.22347600  |
| N  | -5.06520300 | 1.80283000  | -0.81482400 |
| N  | -4.23801600 | 0.52056900  | 1.43476400  |
| Cl | -6.30233600 | 0.74374000  | 3.52627300  |
| Cl | -5.67936700 | -1.96609500 | 2.05165100  |
| P  | -5.71280700 | 0.01586500  | 1.72583400  |
| N  | -6.83256500 | 0.34305700  | 0.64892600  |

(N<sub>3</sub>P<sub>3</sub>Cl<sub>6</sub>)<sub>4</sub> by APFD

$n_i = 0$

|    |             |             |             |
|----|-------------|-------------|-------------|
| Cl | 0.41331800  | 2.19541600  | 2.49781800  |
| Cl | 1.91196500  | -0.11999000 | 1.05497400  |
| Cl | 5.17177200  | 3.61973100  | -0.52914800 |
| Cl | 3.33495200  | 5.51982500  | 1.13100300  |
| P  | 1.56038100  | 1.83009700  | 0.88507400  |
| P  | 3.28023400  | 3.81798300  | 0.06133600  |
| N  | 2.91801300  | 2.62427900  | 1.03375500  |
| N  | 2.36824500  | 4.05299600  | -1.21332700 |
| Cl | 0.89354500  | 2.60332000  | -3.27549400 |
| Cl | -0.52011300 | 4.57804000  | -1.32270800 |

|    |             |             |             |
|----|-------------|-------------|-------------|
| P  | 1.00468000  | 3.27382700  | -1.38983900 |
| N  | 0.69451200  | 2.06862300  | -0.41744300 |
| Cl | 2.72412700  | -3.51588000 | 0.98744300  |
| Cl | 5.58394700  | -4.33770900 | 0.03782600  |
| Cl | 7.68282100  | -0.58576800 | 1.76878500  |
| Cl | 5.07068700  | 0.72054500  | 2.86691300  |
| P  | 4.45179000  | -2.71481200 | 0.39908700  |
| P  | 5.70675900  | -0.47786000 | 1.40900300  |
| N  | 5.07447900  | -1.91434400 | 1.61304600  |
| N  | 5.48798600  | 0.24507800  | 0.01815200  |
| Cl | 6.32546700  | -0.74438200 | -2.61301200 |
| Cl | 3.58006000  | 0.64919300  | -2.14671800 |
| P  | 4.89052800  | -0.53830400 | -1.21662800 |
| N  | 4.21221400  | -1.94563000 | -0.96555200 |
| Cl | -3.85258300 | -4.79582200 | -1.39769300 |
| Cl | -4.66808100 | -1.79987200 | -1.65043100 |
| Cl | 0.34863000  | -0.88793500 | -2.40311900 |
| Cl | 0.71256500  | -3.97791200 | -2.20588800 |
| P  | -3.13080800 | -2.94545900 | -1.08204700 |
| P  | -0.44972800 | -2.49219800 | -1.52350000 |
| N  | -1.92126100 | -2.69472700 | -2.06991400 |
| N  | -0.24488900 | -2.36119900 | 0.03825900  |
| Cl | -1.42024600 | -1.14019000 | 2.41023800  |
| Cl | -1.00238200 | -4.21991700 | 2.16345000  |
| P  | -1.43374300 | -2.59518700 | 1.05261100  |
| N  | -2.89471600 | -2.75048200 | 0.46879800  |
| Cl | -7.09763100 | 0.69712300  | -2.36341800 |
| Cl | -7.54597600 | 3.07932000  | -0.39766900 |
| Cl | -3.07388400 | 3.06000400  | 1.12969700  |
| Cl | -2.23098000 | 0.72088000  | -0.73904200 |
| P  | -6.42941900 | 1.42455600  | -0.62090600 |
| P  | -3.81679500 | 1.41205600  | 0.24939900  |
| N  | -4.91757100 | 1.85082100  | -0.80044800 |
| N  | -4.21899900 | 0.37456100  | 1.37171400  |
| Cl | -6.30742800 | 0.71441500  | 3.39742300  |
| Cl | -5.85062800 | -1.98696700 | 1.90635800  |
| P  | -5.73027600 | -0.02133300 | 1.61468500  |

|   |             |            |            |
|---|-------------|------------|------------|
| N | -6.79811600 | 0.39667200 | 0.52251600 |
|---|-------------|------------|------------|

(N<sub>3</sub>P<sub>3</sub>Cl<sub>6</sub>)<sub>8</sub> by B3LYP-D3

$n_i = 0$

|    |             |             |             |
|----|-------------|-------------|-------------|
| Cl | 2.14776600  | -2.72818900 | 0.92080500  |
| Cl | -0.88430400 | -1.93926800 | 0.70602800  |
| Cl | 0.86718500  | 1.14215400  | -3.24277600 |
| Cl | 3.61462100  | -0.26366800 | -2.61007700 |
| P  | 0.95011000  | -1.18930200 | 0.37966300  |
| P  | 1.91552900  | 0.34174400  | -1.71027800 |
| N  | 1.12462100  | -0.92692100 | -1.17810800 |
| N  | 2.26981700  | 1.48333400  | -0.66711300 |
| Cl | 0.22136900  | 2.79178600  | 1.01469700  |
| Cl | 3.11488800  | 2.15526100  | 2.05738500  |
| P  | 1.70897600  | 1.43384800  | 0.82152800  |
| N  | 1.20548800  | 0.02856100  | 1.36344000  |
| Cl | -3.61499700 | -4.11611800 | 1.04828600  |
| Cl | -6.50961800 | -3.58736700 | -0.02590600 |
| Cl | -4.84687200 | -1.08632300 | -3.84075100 |
| Cl | -1.88465300 | -1.26248700 | -2.82041100 |
| P  | -4.67006200 | -2.73459500 | 0.03252800  |
| P  | -3.77676100 | -1.24907700 | -2.12842000 |
| N  | -4.09833900 | -2.64415500 | -1.44580500 |
| N  | -3.99692400 | 0.06436900  | -1.27021800 |
| Cl | -5.97737200 | 1.25490200  | 0.53766000  |
| Cl | -2.97491600 | 0.91247400  | 1.36749800  |
| P  | -4.41095900 | 0.02215400  | 0.26117100  |
| N  | -4.73439100 | -1.40077200 | 0.88708900  |
| Cl | 1.01226300  | -9.59865200 | -0.47456600 |
| Cl | 3.50527500  | -7.69191900 | -0.33198900 |
| Cl | 0.41592900  | -5.02051900 | 3.10395800  |
| Cl | -1.68772900 | -7.21420000 | 2.30587700  |
| P  | 1.49654500  | -7.65091200 | -0.18441100 |
| P  | -0.08171300 | -6.20964100 | 1.56112500  |
| N  | 1.10034000  | -7.23514300 | 1.29739900  |
| N  | -0.56204200 | -5.30959100 | 0.35043800  |
| Cl | 0.34515300  | -4.01014800 | -2.11793400 |

|    |              |             |             |
|----|--------------|-------------|-------------|
| Cl | -1.89762800  | -6.21407500 | -2.11658600 |
| P  | -0.19978100  | -5.68085900 | -1.14996900 |
| N  | 0.90876100   | -6.79365000 | -1.38142700 |
| Cl | -9.71068900  | -5.14355100 | 0.10182300  |
| Cl | -12.33907000 | -3.49140200 | 0.61663700  |
| Cl | -10.65875800 | 0.46357400  | -1.35275300 |
| Cl | -7.83955500  | -0.77215900 | -1.99194700 |
| P  | -10.33093300 | -3.25751600 | 0.46342100  |
| P  | -9.35355100  | -0.92808700 | -0.66779700 |
| N  | -10.01022800 | -2.36569800 | -0.80885700 |
| N  | -8.83903000  | -0.48379300 | 0.76278300  |
| Cl | -10.22130300 | -0.28619900 | 3.35537700  |
| Cl | -7.36220900  | -1.57075000 | 3.05935100  |
| P  | -9.09232700  | -1.36212800 | 2.05932500  |
| N  | -9.75469600  | -2.79168100 | 1.86474200  |
| Cl | -2.37194100  | 2.68241000  | -1.90645000 |
| Cl | -0.07695600  | 4.83005000  | -2.12290900 |
| Cl | -2.32661100  | 6.84032900  | 2.19289700  |
| Cl | -4.29999400  | 4.40529900  | 1.90445800  |
| P  | -1.97100500  | 4.61650800  | -1.48764500 |
| P  | -3.15386200  | 5.65798000  | 0.79504100  |
| N  | -2.00668100  | 4.81934100  | 0.08913700  |
| N  | -4.10261900  | 6.53370500  | -0.12768700 |
| Cl | -3.91544800  | 8.30447700  | -2.46791000 |
| Cl | -5.85472200  | 5.82203500  | -2.39033100 |
| P  | -4.04856600  | 6.43561500  | -1.70907600 |
| N  | -2.91576800  | 5.54336700  | -2.36518800 |
| Cl | 7.02742400   | -8.30006600 | -0.57777600 |
| Cl | 9.15498700   | -6.00810300 | -0.20589300 |
| Cl | 6.46416700   | -3.58162700 | 2.87146700  |
| Cl | 4.01893900   | -5.54242100 | 2.60120900  |
| P  | 7.15163600   | -6.32270500 | -0.19890800 |
| P  | 5.59729000   | -4.84918700 | 1.55480500  |
| N  | 6.59186800   | -6.04976800 | 1.26003600  |
| N  | 5.05911500   | -4.01521200 | 0.31944000  |
| Cl | 6.36600700   | -2.63543200 | -1.93594900 |
| Cl | 3.88399800   | -4.53091200 | -2.31891700 |

|    |             |             |             |
|----|-------------|-------------|-------------|
| P  | 5.52058500  | -4.30545200 | -1.17010700 |
| N  | 6.49707400  | -5.53430200 | -1.40851100 |
| Cl | 8.11498400  | -0.81409000 | 0.85182600  |
| Cl | 4.97602100  | -0.68952500 | 0.90236000  |
| Cl | 5.57577900  | 2.80572900  | -2.98862000 |
| Cl | 8.64215100  | 2.24250300  | -2.58554000 |
| P  | 6.56966400  | 0.45584500  | 0.49173900  |
| P  | 6.89162400  | 2.28839900  | -1.55623200 |
| N  | 6.55974100  | 0.81999900  | -1.05412900 |
| N  | 6.95463400  | 3.44839400  | -0.47686200 |
| Cl | 5.83616700  | 4.42523300  | 2.05221600  |
| Cl | 8.86053300  | 3.58613800  | 1.77832100  |
| P  | 7.00997800  | 3.12330700  | 1.07665800  |
| N  | 6.63705600  | 1.64994600  | 1.53454400  |
| Cl | 3.23892300  | 4.54322100  | -0.89236300 |
| Cl | 5.05529300  | 7.07215800  | -0.42420400 |
| Cl | 2.84299200  | 7.94486800  | 3.86795700  |
| Cl | 0.90330500  | 5.50517600  | 3.43611400  |
| P  | 3.20728300  | 6.35039500  | -0.02045300 |
| P  | 1.94481000  | 6.88210300  | 2.39473900  |
| N  | 3.06790700  | 6.15082500  | 1.54931400  |
| N  | 0.92521500  | 7.82357500  | 1.62498500  |
| Cl | 1.70311900  | 10.11400700 | -0.07302900 |
| Cl | -0.66079400 | 8.19045500  | -0.82644000 |
| P  | 1.13029500  | 8.16997000  | 0.08981000  |
| N  | 2.12554700  | 7.26064900  | -0.74527800 |

$N_3P_3Cl_5^+$  by B3LYP-D3

$n_i = 0$

|    |             |             |             |
|----|-------------|-------------|-------------|
| Cl | -2.48470900 | -1.13143200 | -1.58533200 |
| Cl | -2.47685900 | -1.13361800 | 1.58709900  |
| Cl | 0.00000500  | 3.67814500  | 0.00146700  |
| P  | -1.42302100 | -0.59172100 | -0.00150500 |
| P  | 0.00002100  | 1.74727900  | 0.00038600  |
| N  | -1.38827200 | 1.06542600  | -0.00008200 |
| N  | 1.38830000  | 1.06543000  | -0.00015100 |
| Cl | 2.47683600  | -1.13357200 | 1.58711100  |

|    |             |             |             |
|----|-------------|-------------|-------------|
| Cl | 2.48472000  | -1.13150500 | -1.58530200 |
| P  | 1.42300100  | -0.59174200 | -0.00151200 |
| N  | -0.00001000 | -1.26993500 | -0.00637500 |

[N<sub>3</sub>P<sub>3</sub>Cl<sub>5</sub>·N<sub>3</sub>P<sub>3</sub>Cl<sub>6</sub>]<sup>+</sup> by B3LYP-D3

$n_i = 0$

|    |             |             |             |
|----|-------------|-------------|-------------|
| Cl | 2.93041100  | -2.98985900 | 0.47001800  |
| Cl | 4.66462500  | -1.28927700 | 2.49361000  |
| Cl | 0.65105100  | 2.23151900  | 1.44382700  |
| Cl | -0.00048900 | 0.00192600  | -0.84798200 |
| P  | 3.49868500  | -1.11003200 | 0.88749300  |
| P  | 1.70750800  | 0.91325300  | 0.44330600  |
| N  | 2.18185300  | -0.27714200 | 1.33714800  |
| N  | 2.59275000  | 1.55289500  | -0.67126800 |
| Cl | 5.42064500  | 2.07608900  | -1.17597500 |
| Cl | 3.66676200  | 0.26845000  | -3.09012200 |
| P  | 3.92146200  | 0.76440800  | -1.16783800 |
| N  | 4.31293000  | -0.51749700 | -0.32836600 |
| Cl | -0.65028100 | -2.23461500 | 1.43926900  |
| Cl | -2.92620000 | 2.98704200  | 0.47158800  |
| Cl | -4.66413100 | 1.29052300  | 2.49551700  |
| P  | -1.70879400 | -0.91512200 | 0.44309200  |
| P  | -3.49855800 | 1.10859600  | 0.88964000  |
| N  | -2.18342800 | 0.27292600  | 1.33973200  |
| N  | -4.31393900 | 0.51699500  | -0.32590100 |
| Cl | -3.66822200 | -0.26349700 | -3.08955200 |
| Cl | -5.42118100 | -2.07501600 | -1.17819500 |
| P  | -3.92233100 | -0.76300200 | -1.16820800 |
| N  | -2.59308400 | -1.55208600 | -0.67367700 |

### S3. Supporting Tables and Figures

**Table S3.1.** Positions of atoms in the HCCP lattice structure

| N | Label | SybylType | Xfrac + ESD | Yfrac + ESD | Zfrac + ESD | Symm. op. |
|---|-------|-----------|-------------|-------------|-------------|-----------|
| 1 | Cl1   | Cl        | 0.31235(4)  | 0.25        | 0.45314(10) | x,y,z     |
| 2 | Cl2   | Cl        | 0.39792(4)  | 0.25        | 0.92081(10) | x,y,z     |
| 3 | Cl3   | Cl        | 0.68246(3)  | 0.45138(4)  | 0.60815(7)  | x,y,z     |

|    |     |     |             |             |             |           |
|----|-----|-----|-------------|-------------|-------------|-----------|
| 4  | Cl4 | Cl  | 0.58520(3)  | 0.42968(4)  | 0.15248(7)  | x,y,z     |
| 5  | P1  | P.3 | 0.43926(4)  | 0.25        | 0.60760(10) | x,y,z     |
| 6  | P2  | P.3 | 0.59529(3)  | 0.35721(4)  | 0.44158(7)  | x,y,z     |
| 7  | N1  | N.2 | 0.49286(10) | 0.35596(12) | 0.5560(2)   | x,y,z     |
| 8  | N2  | N.2 | 0.64903(14) | 0.25        | 0.4058(3)   | x,y,z     |
| 9  | Cl3 | Cl  | 0.68246(3)  | 0.04862(4)  | 0.60815(7)  | x,1/2-y,z |
| 10 | Cl4 | Cl  | 0.58520(3)  | 0.07032(4)  | 0.15248(7)  | x,1/2-y,z |
| 11 | P2  | P.3 | 0.59529(3)  | 0.14279(4)  | 0.44158(7)  | x,1/2-y,z |
| 12 | N1  | N.2 | 0.49286(10) | 0.14404(12) | 0.5560(2)   | x,1/2-y,z |

**Table S3.2.** Bond length values in the HCCP lattice structure

| Number | Atom1 | Atom2 | Polymeric | Cyclicity | Length, Å |
|--------|-------|-------|-----------|-----------|-----------|
| 1      | Cl1   | P1    | no        | acyclic   | 1.9941(5) |
| 2      | Cl2   | P1    | no        | acyclic   | 1.9896(5) |
| 3      | Cl3   | P2    | no        | acyclic   | 1.9859(6) |
| 4      | Cl4   | P2    | no        | acyclic   | 1.9939(6) |
| 5      | P1    | N1    | no        | cyclic    | 1.580(1)  |
| 6      | P1    | N1    | no        | cyclic    | 1.580(1)  |
| 7      | P2    | N1    | no        | cyclic    | 1.581(1)  |
| 8      | P2    | N2    | no        | cyclic    | 1.578(1)  |
| 9      | N2    | P2    | no        | cyclic    | 1.578(1)  |
| 10     | Cl3   | P2    | no        | acyclic   | 1.9859(6) |
| 11     | Cl4   | P2    | no        | acyclic   | 1.9939(6) |
| 12     | P2    | N1    | no        | cyclic    | 1.581(1)  |

**Table S3.3.** Bond angles values in the HCCP lattice structure

| Number | Atom1 | Atom2 | Atom3 | Angle     |
|--------|-------|-------|-------|-----------|
| 1      | Cl1   | P1    | Cl2   | 101.37(4) |
| 2      | Cl1   | P1    | N1    | 108.73(3) |
| 3      | Cl1   | P1    | N1    | 108.73(3) |

|    |     |    |     |           |
|----|-----|----|-----|-----------|
| 4  | Cl2 | P1 | N1  | 109.01(3) |
| 5  | Cl2 | P1 | N1  | 109.01(3) |
| 6  | N1  | P1 | N1  | 118.61(3) |
| 7  | Cl3 | P2 | Cl4 | 102.09(3) |
| 8  | Cl3 | P2 | N1  | 109.13(6) |
| 9  | Cl3 | P2 | N2  | 108.22(3) |
| 10 | Cl4 | P2 | N1  | 109.27(6) |
| 11 | Cl4 | P2 | N2  | 108.50(2) |
| 12 | N1  | P2 | N2  | 118.39(3) |
| 13 | P1  | N1 | P2  | 121.22(3) |
| 14 | P2  | N2 | P2  | 121.10(2) |
| 15 | N2  | P2 | Cl3 | 108.22(3) |
| 16 | N2  | P2 | Cl4 | 108.51(3) |
| 17 | N2  | P2 | N1  | 118.39(4) |
| 18 | Cl3 | P2 | Cl4 | 102.09(3) |
| 19 | Cl3 | P2 | N1  | 109.13(6) |
| 20 | Cl4 | P2 | N1  | 109.27(6) |
| 21 | P1  | N1 | P2  | 121.22(3) |

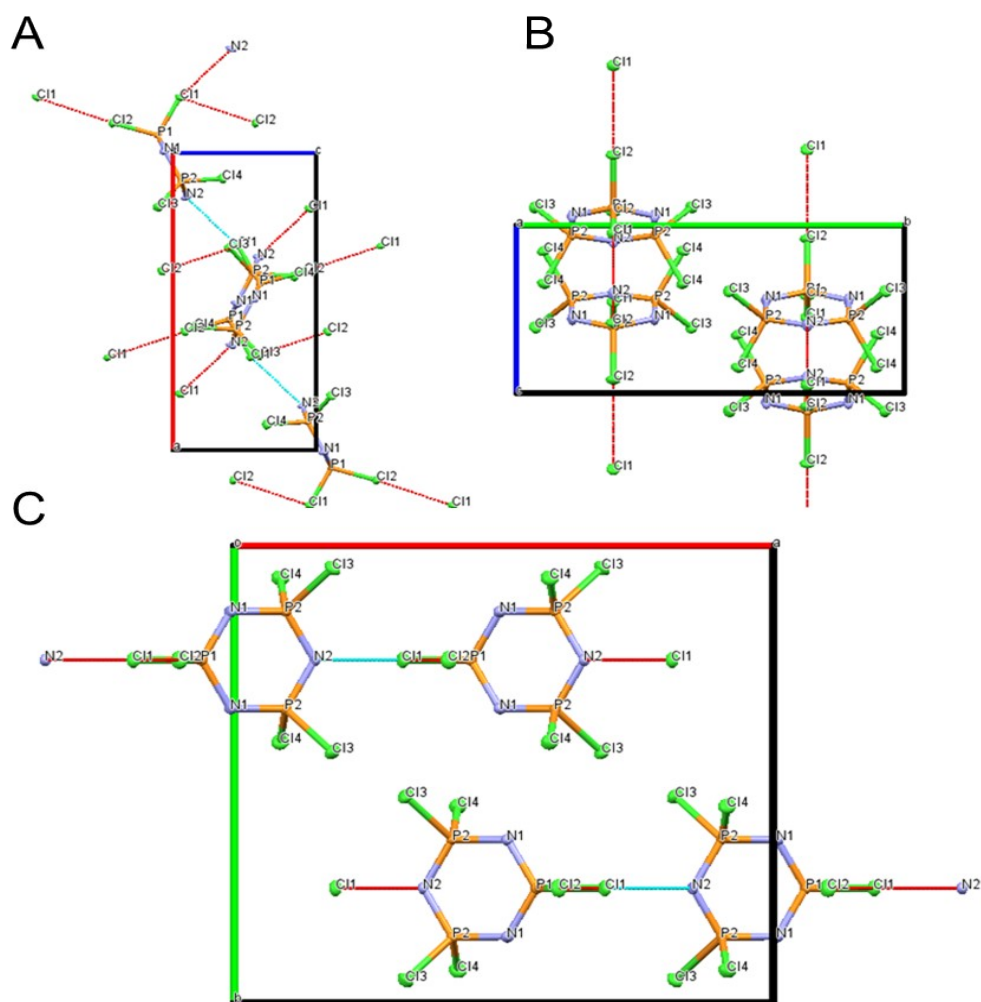

**Figure S3.1.** The crystalline structure of HCCP obtained by the X-ray Diffraction Analysis. The simplest intermolecular assembly is represented. A: through a-axis; B: through b-axis; C: through c-axis.

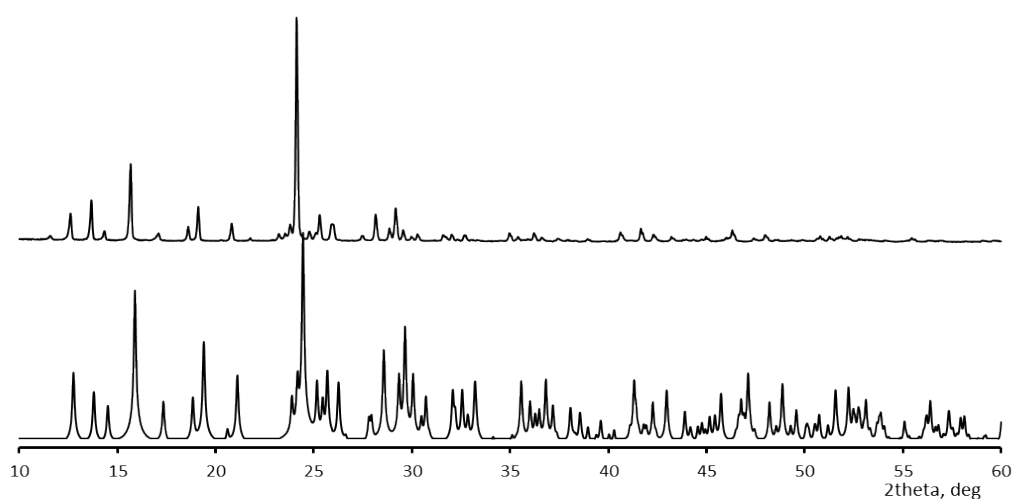

**Figure S3.2.** Up: the experimental pattern; down: the simulated from the cif-file
